# Supplementary material
Source: publisher figshare collection journal article supplement (https://sage.figshare.com/ndownloader/files/18967988)
Supplement: Supplementary file 2 [file 18967988]

Archive with 1 entries (1 files):
- Supplemental Material.pdf
